# Supplementary material
Source: PubMed Central journal article supplement (PMC3431196)

## **Supplemental Data**

### **Radical acceleration of nuclear reprogramming by chromatin remodeling with the transactivation domain of MyoD**

Hiroyuki Hirai, Tetsuya Tani, Nobuko Katoku-Kikyo, Steven Kellner, Peter Karian,  
Meri Firpo, Nobuaki Kikyo

## **Contents**

- 1. Supplemental Materials and Methods**
- 2. Table S1**
- 3. Table S2**
- 4. Supplemental Figure Legends**
- 5. Figure S1**
- 6. Figure S2**
- 7. Figure S3**
- 8. Figure S4**

## **Supplemental Materials and Methods**

### **Immunoblotting**

MEFs were transduced with MyoD-Oct4 fusion genes and analyzed with immunoblotting five days after transduction. All antibodies are listed in supplemental Table S1. SuperSignal West Dura (Thermo Scientific) was used to detect chemiluminescence signal.

### **Fluorescence microscopy**

iPSCs were fixed with 4% formaldehyde for 10 min and permeabilized with 0.5% Triton X-100 for 3 min. Cells were then incubated with primary antibody and secondary antibody for 1 hr each at 25°C. DNA was counterstained with Hoechst 33342. Used antibodies are listed in Table S1. Fluorescence signal was captured with a 10x A-Plan Ph1 Var1 objective (numerical aperture 0.25) and an AxioCam charge coupled device camera attached to an Axiovert 200M fluorescence microscope (all from Zeiss). Photoshop 7.0 (Adobe Systems) was used for image processing.

### **Alkaline phosphatase staining**

Alkaline phosphatase was detected with an Alkaline Phosphatase Detection Kit (Millipore SCR004).

### **Flow cytometry**

The percentage of GFP-positive or SSEA1-positive cells at each time point was determined with a FACSCalibur flow cytometer and analyzed using CellQuest Pro software (both BD Biosciences).

### **Quantitative RT-PCR (qRT-PCR)**

cDNA for mRNA was prepared from iPSC colonies using a Cells-to-cDNA II kit (Ambion). qRT-PCR was performed with GoTaq qPCR Master mix (Promega) on a Realplex 2S system (Eppendorf). PCR primer sequences are listed in Table S2. Expression level of glyceraldehyde 3-phosphate dehydrogenase (GAPDH) was used to normalize the expression levels of mRNAs. The feeder-free ESC line CGR8.8 was used as a positive control.

### **DNA microarray analysis**

RNA was prepared from CGR8.8 cells, MEFs, and a mouse iPSC clone prepared with the fusion gene between the M<sub>3</sub> domain of MyoD and Oct4 (M<sub>3</sub>O-iPSC) on day 60 with the PureLink RNA total RNA purification system (Invitrogen). RNA was amplified and labeled using the Agilent Quick AmpLabeling Kit (Agilent Technologies) following the manufacturer's protocol. cRNA was hybridized overnight to Agilent Whole Murine Genome Oligo Microarray using the Agilent Gene Expression Hybridization Kit. The fluorescence signals of the hybridized microarrays were detected using Agilent's DNA Microarray Scanner. The Agilent Feature Extraction Software was used to read out and process the image files. Data were processed and visualized with Spotfire DecisionSite for Functional Genomics software. DNA microarray data have been deposited in the NCBI GEO database under the accession number GSE22327.

### **Karyotyping of human iPSCs**

Adherent cells were arrested with colcemid, harvested, treated with 75mM KCl hypotonic solution, and fixed with methanol and acetic acid at 3:1. The cells were spread onto glass slides and stained with Wright-Giemsa stain. G-banded metaphases were evaluated using an Olympus BX61 microscope outfitted with 10x and 100x objectives. Metaphase cells were imaged and karyotyped using Applied Spectral Imaging (ASI) software.

### **Aggregation chimera and teratoma formation**

Ten M<sub>3</sub>O-iPSCs of a cloned line were transferred into a microdrop of KSOMaa solution (Millipore) with a zona-free 8-cell stage mouse embryo of the ICR strain (albino) after brief exposure to acidic Tyrode's solution (Millipore). Aggregated morula stage embryos at 2.5 days post coitum (dpc) that contained GFP-positive iPSCs were transferred into the uteri of 2.5 dpc pseudopregnant recipient mice. Embryos at 13.5 dpc were analyzed for chimera formation with X gal stain or for germline transmission with a fluorescence microscope. To prepare teratomas, one million cloned mouse or human M<sub>3</sub>O-iPSCs were injected into the limb muscle of NOD/SCID mice. Teratomas were fixed with 10% formalin and embedded with paraffin after three weeks for mouse iPSCs and eight weeks for human iPSCs. Five- $\mu$ m thick sections were stained with haematoxylin and eosin for histological analysis.

### **Chromatin immunoprecipitation (ChIP)**

ChIP was performed as described in the instruction of the EZ Magna ChIP G kit (Millipore). All antibodies are listed in Table S1. PCR primer sequences are listed in Table S2. PCR amplification levels were first normalized against the value obtained with control IgG. The normalized values with ESCs or MEFs were then defined as 1.0 depending on antibodies to obtain relative expression levels in other cells.

### **DNA methylation analysis**

Genomic DNA from mouse iPSCs was treated with bisulfite with an EZ DNA Methylation-Gold kit (Zymo Research). The DNA sequence at the *Oct4* proximal promoter region was amplified with PCR using the primers listed in Table S2 and cloned into the pCR2.1-TOPO vector (Invitrogen) for sequencing.

**Table S1. Antibodies used in immunoblotting, immunofluorescence staining and ChIP****Immunoblotting (primary antibodies)**

| <b>Antigen</b> | <b>Manufacturer</b>      | <b>Catalog #</b> |
|----------------|--------------------------|------------------|
| Oct4           | Santa Cruz Biotechnology | sc-9081          |
| Histone H2A    | IMAGENEX                 | IMG-358          |

**Immunoblotting (secondary antibodies)**

| <b>Name</b>                           | <b>Manufacturer</b>    | <b>Catalog #</b> |
|---------------------------------------|------------------------|------------------|
| Peroxidase-conjugated anti-rabbit IgG | Jackson ImmunoResearch | 211-032-171      |
| Peroxidase-conjugated anti-mouse IgG  | Jackson ImmunoResearch | 115-035-174      |

**Immunofluorescence staining (primary antibodies)**

| <b>Antigen</b>                    | <b>Manufacturer</b>      | <b>Catalog #</b> |
|-----------------------------------|--------------------------|------------------|
| Oct4                              | Santa Cruz Biotechnology | sc-8628          |
| Nanog                             | Abcam                    | ab21624          |
| SSEA1                             | R&D Systems              | FAB2155P         |
| SSEA4, Alexa Fluor 488-labeled    | BD Biosciences           | 560308           |
| TRA-1-60, Alexa Fluor 555-labeled | BD Biosciences           | 560121           |
| TRA-1-81, phycoerythrin-labeled   | BD Biosciences           | 560161           |

**Immunofluorescence staining (secondary antibodies)**

| <b>Name</b>                             | <b>Manufacturer</b> | <b>Catalog #</b> |
|-----------------------------------------|---------------------|------------------|
| PE-labeled anti-mouse Ig(M+G)           | BD Biosciences      | 550589           |
| Alexa Fluor 555-labeled anti-rabbit IgG | Invitrogen          | A21429           |
| Alexa Fluor 488-labeled anti-goat IgG   | Invitrogen          | A11055           |

## ChIP

| Antigen      | Manufacturer             | Catalog # |
|--------------|--------------------------|-----------|
| Oct4         | Santa Cruz Biotechnology | sc-9081   |
| Sox2         | Santa Cruz Biotechnology | sc-17320  |
| Parafibromin | Bethyl Laboratories      | A300-170A |
| Paf1         | Abcam                    | ab-20662  |
| Leo1         | Abcam                    | ab-70630  |
| H3K4me3      | Abcam                    | ab-1012   |
| H3K9ac       | Abcam                    | ab-4441   |
| H3K14ac      | Millipore                | 07-353    |
| H3K9me3      | Millipore                | 07-523    |
| H3K27me3     | Millipore                | 07-449    |
| Control IgG  | Santa Cruz Biotechnology | sc-2027   |

**Table S2. Primers used for quantitative RT-PCR, bisulfite sequencing and ChIP**

**Quantitative RT-PCR (mouse)**

| Gene            | Forward                  | Reverse                   |
|-----------------|--------------------------|---------------------------|
| Oct4 endogenous | TCTTTCCACCAGGCCCCCGGCTC  | TGCGGGCGGACATGGGGAGATCC   |
| Sox2 endogenous | AAAGGAGAGAAGTTTGGAGCCCGA | GGGCGAAGTGCAATTGGGATGAAA  |
| Nanog           | AGCAGAAGATGCGGACTGTGTTCT | CCGCTTGCACTTCATCCTTTGGTT  |
| Thy1            | GCCTGACCCGAGAGAAGAAGAAG  | TGGTGGTGAAGTTCGCTAGAGTAAG |
| Col6a2          | CCACCACTGAAAGGAACAACAA   | TCCAACACGAAATACACGTTGAC   |
| Fgf7            | CCATGAACAAGGAAGGGAAA     | TCCGCTGTGTGTCCATTTAG      |
| GAPDH           | TGCACCACCAACTGCTTAG      | GATGCAGGGATGATGTTC        |

**Quantitative RT-PCR (human)**

| Gene            | Forward                  | Reverse                  |
|-----------------|--------------------------|--------------------------|
| OCT4 endogenous | CCTCACTTCACTGCACTGTA     | CAGGTTTTCTTTCCCTAGCT     |
| SOX2 endogenous | CCCAGCAGACTTCACATGT      | CCTCCCATTTCCCTCGTTTT     |
| KLF4 endogenous | GATGAACTGACCAGGCACTA     | GTGGGTCATATCCACTGTCT     |
| c-MYC endo.     | TGCCTCAAATTGGACTTTGG     | GATTGAAATTCTGTGTAAGTGC   |
| NANOG           | TGAACCTCAGCTACAAACAG     | TGGTGGTAGGAAGAGTAAAG     |
| LIN28           | GAGCATGCAGAAGCGCAGATCAAA | TATGGCTGATGCTCTGGCAGAAGT |
| DPPA2           | AGGCTTCATAGGCATGCTTACCCT | TGAAGCCTTGCTCTCTTGGTCACT |
| DPPA4           | AGACACAGATGGTTGGGTTCACCT | TGCACTCACTCTCCCTTCTTGCTT |
| GDF3            | ACACCTGTGCCAGACTAAGATGCT | TGACGGTGGCAGAGGTTCTTACAA |
| REX1            | TGAATAGCTGACCACCAGCACACT | ACAGGCTCCAGCCTCAGTACATTT |
| TERT            | TGTGCACCAACATCTACAAG     | GCGTTCTTGGCTTTTCAGGAT    |
| TDGF1           | TGCCCAAGAAGTGTTCCCTGTGTA | AAAGTGGTAGTACGTGCAGACGGT |
| GAPDH           | AACAGCGACACCCACTCCTC     | CATACCAGGAAATGAGCTTGACAA |

### Bisulfite sequencing

| Gene | Forward                | Reverse                 |
|------|------------------------|-------------------------|
| Oct4 | AGGTTGAAAATGAAGGTTTTTT | TCCAACCCTACTAACCCATCACC |

### ChIP

| Region        | Forward                            | Reverse                            |
|---------------|------------------------------------|------------------------------------|
| Oct4 Region 1 | GGAAGTGGGTGTGGGGAGGTTGT<br>A       | AGCAGATTAAGGAAGGGCTAGGAC<br>GAGAG  |
| Oct4 Region 2 | AGGTCAAGGGGCTAGAGGGTGGG<br>ATT     | TGAGAAGGCGAAGTCTGAAGCCA            |
| Oct4 Region 3 | TAGGAGCTCTTGTTTGGGCCATGT           | ACAAGGGTCTGCTCGTGTAAGGT            |
| Sox2 Region 1 | TTTTGGTTTTTAGGGTAAGGTACT<br>GGGAAG | CCACGTGAATAATCCTATATGCATCA<br>CAAT |
| Sox2 Region 2 | CACATGAAGGAGCACCCGGATTAT           | TCCGGGAAGCGTGTACTTATCCTT           |

## Supplemental Figure Legends

### **Figure S1.** Immunoblotting of MyoD-Oct4 fusion proteins.

Expression of transduced MyoD-Oct4 fusion genes was evaluated with an antibody against Oct4 (top). Expression of histone H2A was examined as a loading control (bottom). Bands correspond to the predicted molecular mass of each protein. Identities of extra bands marked with asterisks are unknown.

### **Figure S2.** ChIP analyses of the *Sox2* gene.

- (A) Binding of Oct4 and Sox2 at the enhancer.
- (B) Binding of parafibromin and the levels of histone modifications associated with active genes on day 9.
- (C) Levels of histone modifications associated with suppressive genes on day 9.

### **Figure S3.** ChIP analyses on day 9 of the *Oct4* gene comparing transduction of one (1F), two (2F), three (3F) and four (4F) transcription factor genes.

- (A) Transcription factor binding.
- (B) Histone modifications associated with gene activation.

### **Figure S4.** ChIP analyses on day 9 of the *Sox2* gene comparing transduction of one (1F), two (2F), three (3F) and four (4F) transcription factor genes.

- (A) Transcription factor binding at the enhancer.
- (B) Histone modifications associated with gene activation and suppression.

Fig. S1 Kikyo

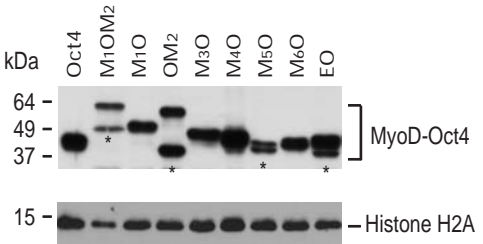

**A**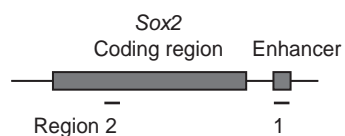**Region 1**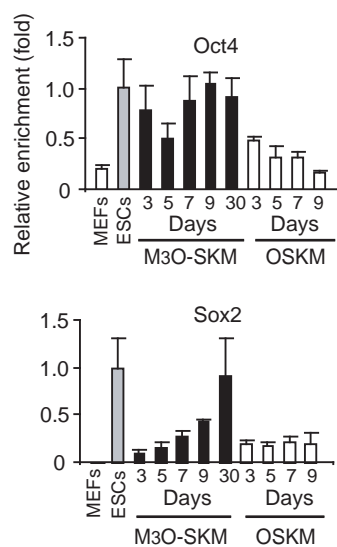**B****Region 2**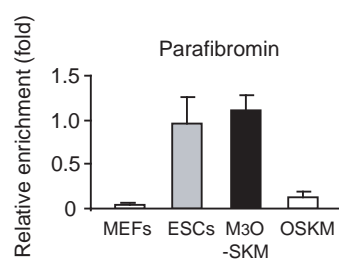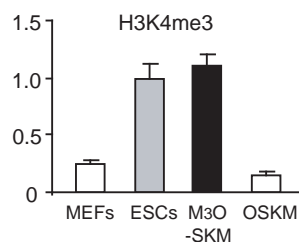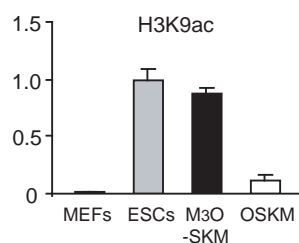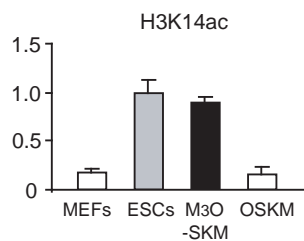**C****Region 2**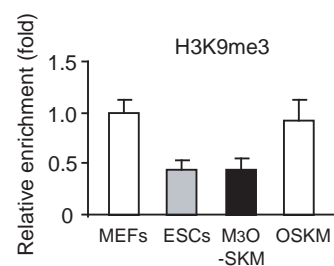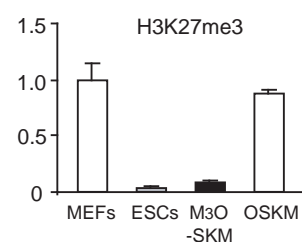

**A**

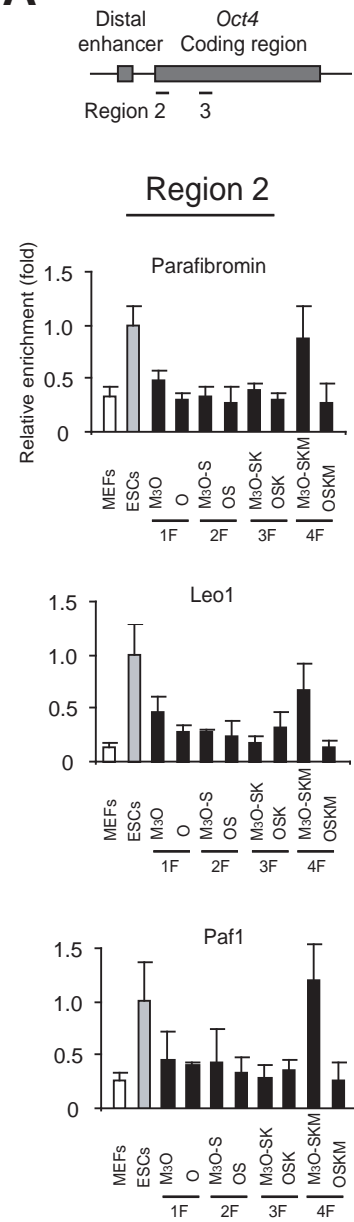

**B**

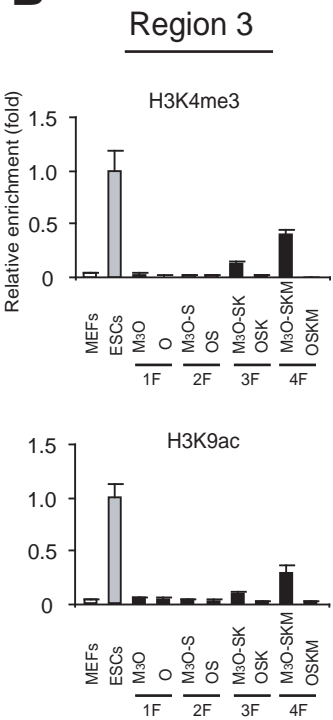

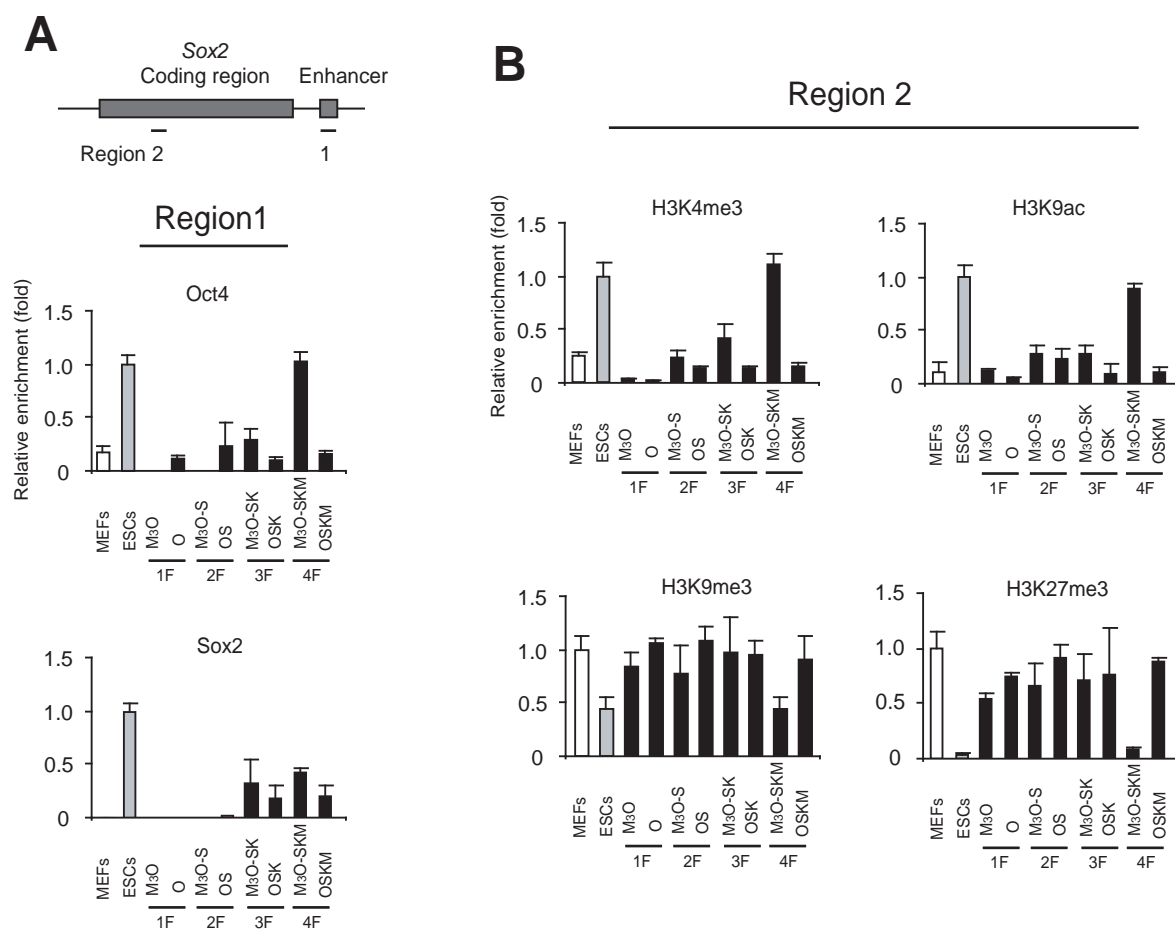

Supplement: NIHMS397708-supplement-Complete_suppl.pdf [file NIHMS397708-supplement-Complete_suppl.pdf]
